# Supplementary material for: Inundation, Hydrodynamics and Vegetation Influence Carbon Dioxide Concentrations in Amazon Floodplain Lakes
Source: Springer Nature journal article supplement (doi:10.1007/s10021-021-00692-y), 2021-08-17
Supplement: MOESM1 [file 10021_2021_692_MOESM1_ESM.docx]

**Inundation, hydrodynamics, and vegetation influence carbon dioxide concentrations in Amazon floodplain lakes**

João Henrique Fernandes Amaral1,2*, John Michael Melack1,3, Pedro Maia Barbosa1,4, Alberto Vieira Borges5, Daniele Kasper4, Alicia Cortes Cortés6, Wencai Zhou1, Sally MacIntyre1 and Bruce Rider Forsberg2,7

1Earth Research Institute, University of California, Santa Barbara, California, USA

2Coordenação de Dinâmica Ambiental, Laboratório de Ecossistemas Aquáticos, Instituto Nacional de Pesquisas da Amazônia, Manaus, Amazonas, Brazil

3Bren School of Environmental Science and Management, University of California, Santa Barbara, California, USA

4Centro de Ciências da Saúde, Universidade Federal do Rio de Janeiro, Rio de Janeiro, Rio de Janeiro, Brazil

5Chemical Oceanography Unit, University of Liège, Liège, Belgium

6Marine Science Institute, University of California, Santa Barbara, California, USA

7Vermont Department of Environmental Conservation, Montpelier, Vermont, USA

Author Contributions[[1]](#footnote-1)

**Supplementary Materials**

*Expanded methods* description: The following descriptions are based on material published in Barbosa and others (2018, 2020) and Amaral and others (2018, 2020).

*Study site:* Lake Janauacá (3°23′ S, 60°18′ W; altitude 32 m), located on the right floodplain of the Solimões River, 40 km southeast of Manaus has a local watershed area of 770 km2 and a floodable area that varies from 23 km2 at low water to 390 km2 at high water (Pinel and others 2015). Lake depths vary spatially and seasonally, ranging from 1 to 3 m at low water and from 9 to 13 m during high water. The lake is connected to the Solimões River year-round by a 12 km long channel and intermittently by other channels to the west and north. The catchment around the southern part of the lake drains forested and agricultural areas with streams of low conductivity (10–30 μS cm−1) and low suspended solid concentrations (20 mg L−1). An extensive floodplain occupies the northern portion where aquatic habitats vary seasonally. The lake receives seasonal inputs of Solimões River water.

*Analytical measurements*: Water for analyses of chlorophyll-*a* (Chl-*a*), total nitrogen (TN), total phosphorus (TP), total suspended solids (TSS), dissolved organic carbon (DOC), and indices of dissolved organic matter (DOM) was collected from ~0.3 m. Water for Chl-*a* was filtered through glass fiber GF/F filters (Whatman), and filters were stored frozen in the dark until analysis. Chl-*a* was determined spectrophotometrically, following filter maceration and extraction in 90% acetone, using the trichromatic equations of Strickland and Parsons (1972). TN and TP were determined by simultaneous analysis on unfiltered samples after persulfate digestion (Valderrama 1981) followed by nitrate and phosphorus assays (Strickland and Parsons 1972). TSS was determined by weighing particulates collected on pre-weighed Millipore HA filters (0.45 μm pore size), following the method of Kasper and others (2018). DOC samples were filtered through pre-combusted (450–500 °C for 1 h) glass fiber GF/F filters (Whatman) collected in pre-cleaned (10% HCl wash, deionized water rinse) and pre-combusted (450–500 °C for 1 h) borosilicate vials and then stored at 4 °C until analysis. DOC was determined using a total organic carbon analyzer (TOC-V Shimadzu). Filtered water for DOM spectral analysis was collected in amber borosilicate vials, stored refrigerated (4 °C) in the dark, and then scanned from 180 to 700 nm in a UV-VIS spectrophotometer (Shimadzu UV-VIS 1800) using a 1 cm quartz cuvette and ultra-pure water as reference. SUVA254 (L mgC-1 m-1) is absorbance at 254 nm divided by DOC concentration. SUVA254 is a proxy for aromatic content, with higher values associated with greater aromaticity (Weishaar and others 2003). SR was calculated as the ratio of the spectral slope between 275-295 nm by the spectral slope between 350-400 nm. SR was determined from the linear regression of the log-transformed absorbance spectra and is inversely associated with the molecular weight of DOC (Helms and others 2008).

*p*CO2: Levels of *p*CO2 were measured with an off-axis integrated cavity output spectrometer (Ultraportable Greenhouse Gas Analyzer - UGGA, Los

Gatos Research) connected to a marble-type equilibrator (Frankignoulle and others 2001), through which lake water was pumped from the upper mixed layer (0.5 m) or from different depths. The equilibrator consisted of a Plexiglas cylinder (80 cm long) filled with marbles with water entering at the top at a rate of 2–3 L min−1 and exiting at the bottom. The UGGA has an internal pump (500 mL min−1) that was connected by an inlet tube at the top of the equilibrator and by an outlet tube at the bottom of the equilibrator allowing the air to circulate through the equilibrator in a closed loop. Three certified standards (*p*CO2 of 1010 and 5000 ppmv, Air Liquid USA and 399 ppmv, White Martins, Manaus, Brazil) were used to check the factory calibration of the UGGA before each field campaign. A mixture of argon and nitrogen (White Martins, Manaus, AM, Brazil) passing through fresh soda lime was used to set the zero. The precision of the measurements varied between 0.04 and 3.6 ppmv, and the accuracy was 104 ± 3.6% for the three standards.

To estimate CO2 concentrations in the water from *p*CO2 values measured with the equilibrator, dry *p*CO2 values were converted from ppmv to µatm and wet air using the water vapor computed from temperature measured at the lake surface (Weiss and Price 1980), and then to concentrations (at atmospheric pressure of 1 atm) using the Henry's constant for CO2 from Wiesenburg and Guinasso (1979).

Depth profiles of dissolved oxygen (DO) and temperature were measured at 0.5 m intervals with a combined temperature/oxygen meter (Yellow Springs Inst. Co., model Pro-ODO, DO accuracy of 0.2 ± 0.1 mg L−1, temperature accuracy ± 0.2 °C, resolution 0.1 °C). Temperature and conductivity profiles were also measured with a CTD profiler (Castway, Sontek Inst. Co) sampling at 4 Hz with data reported at 0.3 m intervals. pH was measured in water from 0.3 m, mid-depth and 0.5 m from bottom with a portable meter and calibrated electrode (Orion Star, Thermo Scientific; precision of 0.1, calibrated with 4.0 and 7.0 standards).

Time series measurements of temperature and oxygen were obtained from sensors on taut-line moorings installed in the open water and vegetated habitats at both sites. The temperature sensors were RBR Solos (accuracy of 0.002 oC) recording every 10 s. The depth of the actively mixing layer was computed as the depth where the temperature difference relative to the upper 0.05 m first reaches 0.02 oC. Dissolved oxygen was measured with optical sensors (PME MiniDOT loggers) recording every 10 minutes.

Vertical profiles of photosynthetically radiation (PAR) in open water sites were measured using an underwater sensor (Licor LI-192 SB), and the diffuse attenuation coefficient (Kd) computed following Beer’s Law. Water transparency was estimated with a Secchi disk. Water depth was measured with a graduated line attached to a weight.

Wind speed and direction (at 2 m and 4 m above the water), PAR and shielded air temperature and relative humidity (2 m above the water) (Onset, Inc. sensors) were sampled every second and averaged for 5 minutes at a meteorological station on a floating research station about 4 km from the open lake site and 1.5 km from the embayment. Wind speed and direction sensors were also deployed at a height of 2 m on a floating buoy at each open water site during each series of measurements.

Table S1. Median and number of observations, mean and standard deviation (±), maximum and minimum near-surface CO2 concentrations (µM) in open water and herbaceous plant habitats at each site during low water (LW), rising water (RW), high water (HW) and falling water (FW). Values including the campaign outliers: *817,14 **911 ± 839 ***2050. nd means not determined because macrophytes were lacking.

|  | | Open water | | | | | | Macrophytes | |
| --- | --- | --- | --- | --- | --- | --- | --- | --- | --- |
| Site | | LW | RW | HW | FW | LW | RW | HW | FW |
| Open lake | Median | 2.7,18 | 140,34 | 215,20 | 150,34 | nd | 225,30 | 242,17 | 192,9 |
| Mean | 7.6±10 | 127±69 | 216±48 | 151±48 | nd | 227±101 | 234±52 | 209±45 |
| Range | 0.2 / 32 | 3.8 / 256 | 87 / 280 | 70 /253 | nd | 8 / 375 | 117 / 333 | 142 / 267 |
| Embayment | Median | 198,13 | 223,45 | 172,23 | 97,25 | 125,7* | 279,34 | 275,9 | 242,14 |
| Mean | 158±120 | 235±80 | 163±80 | 121±80 | 121±54** | 280±66 | 274±44 | 235±73 |
| Range | 3 / 329 | 91 / 430 | 39 / 295 | 10 / 330 | 33 /208*** | 167 / 425 | 208 / 350 | 125 / 358 |

Table S2. Mean and coefficient of variation (CV%) of water-column CO2 (µM) measured in open lake and embayment sites in open water, herbaceous plant mats and flooded forest habitats between November 2014 and September 2016. na means not sampled because habitats were lacking or inaccessible.

|  | **Open Water** | | | | | | **Herbaceous plant** | | | | | **Flooded forest** | | | |
| --- | --- | --- | --- | --- | --- | --- | --- | --- | --- | --- | --- | --- | --- | --- | --- |
| **Month. Year** | **Open lake** | | | **Embayment** | | | **Open lake** | | | **Embayment** | | **Open lake** | | **Embayment** | |
| **Mean** | **CV(%)** | **Mean** | | **CV(%)** | **Mean** | | **CV(%)** | **Mean** | | **CV(%)** | **Mean** | **CV(%)** | **Mean** | **CV(%)** |
| Nov. 14 | 22 | 62 | 51 | | 72 | na | | na | 180 | | 31 | na | na | na | na |
| Jan. 15 | 44 | 52 | 229 | | 7 | na | | na | 260 | | 10 | na | na | na | na |
| Feb. 15 | 82 | 24 | 202 | | 4 | 153 | | 2 | 244 | | 4 | 78 | 68 | 211 | 13 |
| Mar. 15 | 199 | 19 | 245 | | 3 | 198 | | 7 | 252 | | 9 | 165 | 10 | 154 | 26 |
| Apr. 15 | 231 | 2 | 273 | | 7 | 235 | | 6 | 268 | | 4 | 241 | 8 | 217 | 7 |
| May 15 | 282 | 8 | 322 | | 4 | 297 | | 4 | 328 | | 1 | 277 | 6 | 294 | 3 |
| Jun. 15 | 282 | 3 | 390 | | 9 | 277 | | 6 | 360 | | 7 | 263 | 13 | 323 | 3 |
| Jul. 15 | 222 | 5 | 355 | | 11 | 214 | | 4 | 349 | | 11 | 207 | 5 | 302 | 7 |
| Aug. 15 | 251 | 11 | 386 | | 12 | 271 | | 8 | 384 | | 4 | 205 | 16 | 286 | 3 |
| Sept. 15 | 211 | 22 | 302 | | 23 | 208 | | 43 | 252 | | 31 | 217 | 28 | 307 | 24 |
| Oct. 15 | 1 | 102 | 268 | | 16 | na | | na | na | | na | na | na | na | na |
| Jan. 16 | 163 | 8 | 344 | | 20 | 353 | | 4 | 330 | | 11 | na | na | na | na |
| Feb. 16 | 71 | 58 | 432 | | 8 | 207 | | 49 | 402 | | 7 | na | na | na | na |
| Apr. 16 | 209 | 15 | 379 | | 11 | 250 | | 13 | na | | na | na | na | na | na |
| May 16 | 135 | na | 319 | | na | na | | na | na | | na | na | na | na | na |
| Jul. 16 | 263 | 9 | 348 | | 9 | 260 | | 9 | na | | na | na | na | 243 | 7 |
| Aug. 16 | 210 | 21 | 349 | | 22 | 302 | | 18 | na | | na | na | na | 196 | 12 |

Table S3. Environmental variables measured in open water of embayment during rising (RW), high (HW), falling (FW), and low (LW) water periods. CV% - coefficient of variation; Min – minimum; Max – maximum. Temp – temperature, oC; DO - dissolved oxygen, mg L-1; DOC – dissolved organic carbon, mg L-1; Chl-*a*- chlorophyll-*a*, µg L-1; TN - total dissolved nitrogen, µM; TP - total dissolved phosphorous, µM; Secchi – Secchi disk transparency, m; TSS - total suspended solids, mg L-1.

| Embayment | Hydrological period | | | | | | | |
| --- | --- | --- | --- | --- | --- | --- | --- | --- |
| Variable | LW | | RW | | HW | | FW | |
| Mean | CV% | Mean | CV% | Mean | CV% | Mean | CV% | |
| Min | Max | Min | Max | Min | Max | Min | Max | |
| Chl-*a* | 34.3 | 13.8 | 10.2 | 76 | 10.1 | 44 | 15.4 | 84 | |
| 30.9 | 37.6 | 4.4 | 26.2 | 6.0 | 15.0 | 4.3 | 29.7 | |
| Conductivity | 21.3 | 21.9 | 59.8 | 14 | 45.2 | 21 | 41.8 | 21 | |
| 18.0 | 24.6 | 48.5 | 74.0 | 38.6 | 64.0 | 31.8 | 50.8 | |
| depth | 1.1 | 60.6 | 5.5 | 49 | 9.5 | 20 | 7.2 | 29 | |
| 0.6 | 1.5 | 1.9 | 9.2 | 7.0 | 11.5 | 5.8 | 10.2 | |
| DO Surface | 6.9 | 49.2 | 3.0 | 57 | 3.9 | 62 | 4.9 | 47 | |
| 4.5 | 9.3 | 1.5 | 6.6 | 1.2 | 6.8 | 2.3 | 7.7 | |
| DO Bottom | 5.7 | 5.0 | 0.9 | 97 | 0.2 | 75 | 0.2 | 111 | |
| 5.5 | 5.9 | 0.1 | 2.2 | 0.1 | 0.4 | 0.1 | 0.6 | |
| DOC | 4.3 | 3.3 | 5.1 | 17 | 5.1 | 30 | 5.0 | 19 | |
| 4.2 | 4.4 | 4.0 | 6.3 | 2.5 | 6.6 | 4.1 | 6.0 | |
| TN | 50.1 | 13.3 | 93 | 182 | 23.4 | 73.5 | 31.2 | 62.3 | |
| 45.4 | 54.8 | 10.2 | 473.8 | 7.3 | 52.1 | 7.3 | 54.6 | |
| pH | 6.5 | 1.1 | 6.5 | 5 | 6.7 | 3 | 6.7 | 0 | |
| 6.4 | 6.5 | 6.0 | 6.9 | 6.4 | 6.9 | 6.7 | 6.7 | |
| TP | 4.7 | 105.3 | 1.6 | 95 | 2.2 | 84 | 1.2 | 86 | |
| 1.2 | 8.2 | 0.2 | 3.9 | 0.5 | 4.3 | 0.4 | 2.7 | |
| Secchi | 0.3 | 28.3 | 0.7 | 53 | 1.4 | 27 | 1.5 | 21 | |
| 0.2 | 0.3 | 0.2 | 1.2 | 0.7 | 1.8 | 1.2 | 1.9 | |
| Temp. Surface | 31.0 | 2.1 | 29.8 | 2 | 30.1 | 2 | 30.8 | 2 | |
| 30.5 | 31.4 | 28.6 | 30.8 | 29.1 | 30.9 | 30.2 | 31.8 | |
| Temp Bottom | 30.5 | 0.7 | 28.9 | 2 | 29.2 | 2 | 30.4 | 1 | |
| 30.3 | 30.6 | 28 | 29.9 | 28.7 | 30.2 | 30 | 31 | |
| TSS | 50.1 | 55.3 | 22.9 | 88 | 4.0 | 39 | 4.4 | 25 | |
| 30.5 | 69.7 | 5 | 62.3 | 2.4 | 6.1 | 3.2 | 5.3 | |

Table S4. Environmental variables measured in open water of lake during rising (RW), high (HW), falling (FW), and low (LW) water periods. CV% - coefficient of variation; Min – mínimum; Max – máximum. Temp – temperature, oC; DO - dissolved oxygen, mg L-1; DOC – dissolved organic carbon, mg L-1; Chl-*a*- chlorophyll-*a*, µg L-1; TN - total dissolved nitrogen, µM; TP - total dissolved phosphorous, µM; Secchi – Secchi disk transparency, m; TSS - total suspended solids, mg L-1.

| Open Lake | Hydrological period | | | | | | | |
| --- | --- | --- | --- | --- | --- | --- | --- | --- |
| Variable | LW | | RW | | HW | | FW | |
| Mean | CV | Mean | CV | Mean | CV | Mean | CV | |
| Min | Max | Min | Max | Min | Max | Min | Max | |
| Chl-*a* | 50.5 | 21 | 26.1 | 156 | 2.8 | 50 | 6.0 | 37 | |
| 43.0 | 57.9 | 3.9 | 116.1 | 0.9 | 5.0 | 4.0 | 9.0 | |
| Conductivity | 32.3 | 43 | 67.4 | 18 | 46.4 | 28 | 47.2 | 11 | |
| 22.4 | 42.1 | 54.0 | 86.9 | 36.5 | 72.0 | 40.2 | 52.2 | |
| depth | 2.1 | 66 | 5.4 | 56 | 9.5 | 17 | 7.6 | 28 | |
| 1.1 | 3.0 | 1.4 | 9.5 | 7.5 | 11.5 | 5.2 | 10.0 | |
| DO Surface | 8.9 | 23 | 5.6 | 38 | 3.1 | 34 | 4.7 | 30 | |
| 7.4 | 10.3 | 2.7 | 9.0 | 1.7 | 4.4 | 2.6 | 5.7 | |
| DO Bottom | 7.9 | 32 | 3.2 | 62 | 1.4 | 69 | 1.6 | 108 | |
| 6.1 | 9.6 | 1.3 | 7.1 | 0.1 | 2.8 | 0.1 | 3.1 | |
| DOC | 4.6 | 12 | 4.7 | 18 | 4.3 | 19 | 4.2 | 42 | |
| 4.2 | 5.0 | 3.5 | 5.4 | 3.3 | 5.3 | 3.1 | 6.2 | |
| TN | 107.9 | 6 | 34.1 | 46 | 20.9 | 75 | 24.8 | 62 | |
| 103.0 | 112.7 | 12 | 52.6 | 4.8 | 45.4 | 4.8 | 41.0 | |
| pH | 8.8 | 5 | 6.8 | 8 | 6.5 | 4 | 6.8 | 2 | |
| 8.5 | 9.1 | 6.4 | 7.9 | 6.2 | 6.8 | 6.7 | 6.9 | |
| TP | 2.3 | 35 | 3.8 | 96 | 1.9 | 85 | 2.1 | 73 | |
| 1.7 | 2.8 | 0.5 | 5.0 | 0.3 | 4.0 | 0.6 | 3.9 | |
| Secchi | 1.0 | 97 | 0.6 | 40 | 1.1 | 36 | 1.3 | 20 | |
| 0.3 | 1.6 | 0.2 | 0.9 | 0.7 | 1.5 | 1.0 | 1.6 | |
| Temp. Surface | 31.8 | 3 | 29.6 | 3 | 29.5 | 1 | 31.1 | 4 | |
| 31.1 | 32.4 | 28.7 | 30.7 | 29.1 | 29.9 | 30.0 | 32.8 | |
| Temp Bottom | 31.5 | 4 | 29.1 | 2 | 29.1 | 1 | 30.9 | 4 | |
| 30.5 | 32.4 | 28.2 | 30.0 | 28.6 | 29.7 | 29.8 | 32.8 | |
| TSS | 36.5 | 15 | 35.0 | 106 | 11.0 | 52 | 27.4 | 116 | |
| 32.7 | 40.2 | 8.6 | 115.0 | 4.5 | 17.2 | 6.5 | 64.0 | |

Table S5. Correlation between environmental variables grouped by terms influencing CO2 concentrations. Inundation includes: changes in water level (ΔZ), and the ratio between open water and inundated forest areas (OW:forest areas). Productivity term includes: near-surface CO2 concentration in herbaceous plant mats (CO2-MAC), chlorophyll a concentration (Chl-a), total nitrogen and total phosphorus concentrations (TN and TP), and light-related variables: depth of the Secchi disk (Secchi), total suspended sediments (TSS) and downwelling attenuation coefficient (Kd). Dissolved organic carbon (DOC) and dissolved organic matter (DOM) term includes DOC concentration and DOM optical properties represented by SUVA, SRand *a*350. Mixing term includes the actively mixing depth and wind speed. The ‘other term’ includes surface conductivity and temperature.

| Equation Term | Variables Correlation | p Value | r2 |
| --- | --- | --- | --- |
| Inundation | ΔZ X OW:Forest areas | 0.97 | -0.01 |
| Productivity | CO2-MAC X chl-a | 0.59 | 0.09 |
|  | CO2-MAC X TN | 0.46 | 0.13 |
|  | CO2-MAC X TP | 0.36 | -0.15 |
|  | CO2-MAC X TSS | 0.05 | 0.32 |
|  | CO2-MAC X Kd | 0.002 | 0.50 |
|  | CO2-MAC X Secchi | 0.12 | -0.25 |
|  | TP X TN | 0.001 | -0.50 |
|  | TP X chl-a | 0.12 | 0.26 |
|  | TP X TSS | 0.61 | 0.09 |
|  | TP X Kd | 0.28 | 0.18 |
|  | TP X Secchi | 0.24 | -0.20 |
|  | TN X chl-a | 0.29 | 0.18 |
|  | TN X TSS | 0.02 | 0.37 |
|  | TN X Kd | 0.35 | 0.16 |
|  | TN X Secchi | 0.45 | -0.13 |
|  | chl-a X TSS | 0.23 | 0.20 |
|  | chl-a X Kd | 0.05 | 0.32 |
|  | chl-a X Secchi | 0.20 | -0.22 |
| Light related variables | TSS X Kd | <0.001 | 0.69 |
|  | TSS X Secchi | <0.001 | -0.65 |
|  | Kd X Secchi | <0.001 | -0.76 |
| DOC/DOM | DOC X SUVA | 0.33 | -0.19 |
|  | DOC X SR | 0.75 | 0.06 |
|  | DOC X *a*350 | 0.62 | 0.35 |
|  | SUVA X SR | 0.11 | -0.30 |
|  | SUVA X *a*350 | <0.001 | 0.62 |
|  | SR X *a*350 | 0.05 | -0.36 |
| Mixing | AML X Wind speed | 0.002 | 0.49 |
| Other | Temp X Cond | 0.008 | -0.43 |


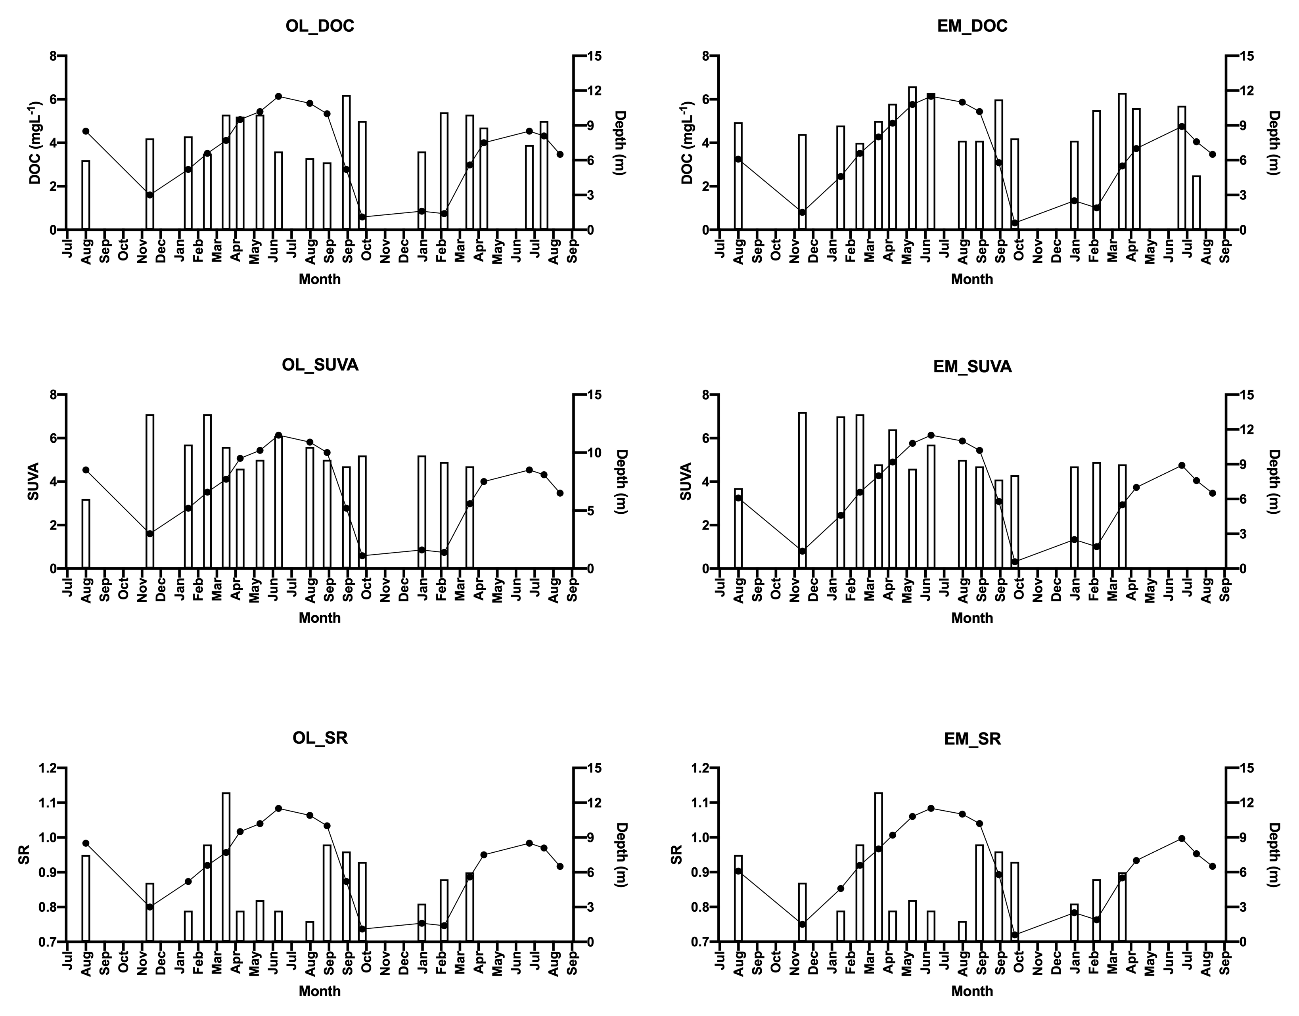


Figure S1. Dissolved organic carbon quantity (DOC, mg L-1) and DOM variables; specific absorbance at the 254 nm normalized by DOC concentration (SUVA), spectral slope ratio (SR) values together with changes with depth between August 2014 and September 2016 in open water habitat in the open lake (OL) and embayment (EM).

*Simulation of hydrodynamic effects of vegetation*

To examine the hydrodynamic effects of a floating herbaceous plant mat, an AEM3D simulation was conducted using the embayment as an example. Open water environmental conditions for day of year (DOY) 272 to 273.31 (Fig. S2) were modified to approximate conditions within vegetated areas (Fig. S3): 1) shortwave albedo 0.048, 40% lower than in the open water; 2) PAR attenuation coefficient 16 versus 1.6 m-1 in the open water; 3) drag coefficient 0.1 in the top 0.5 m of the vegetated area to mimic the drag induced by floating plants. The same vegetation-induced drag was applied to represent flooded forest. The domain is semi-enclosed with an open boundary in the southwest; water level fell at a rate of 0.21 m d-1 during the simulation. A numerical tracer with a maximum CO2 concentration of 235 µM was introduced in the macrophyte mat.


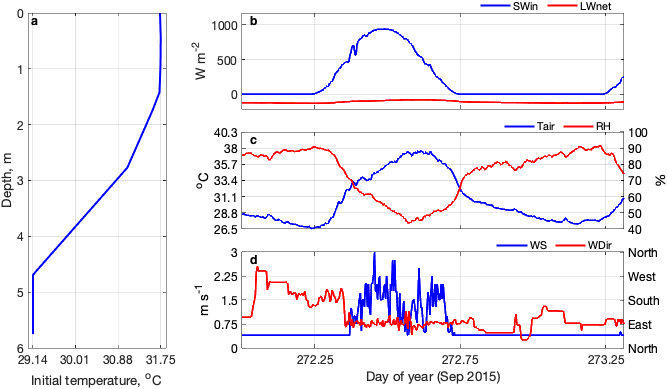


Figure S2. Initial temperature profile (a) and meteorological conditions used to force model: b) incoming shortwave radiation (SWin) and estimated net long wave radiation (LWnet); c) air temperature (Tair) and relative humidity (RH); d) wind speed (WS) and wind direction (WDir).


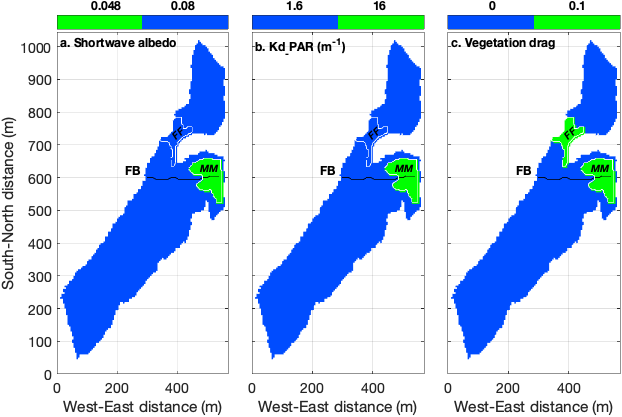


Figure S3. AEM3D configurations to mimic the effects of vegetation. Black line represents the cross-section (FB). MM indicates macrophyte mat; FF indicates flooded forest.

During the simulation, thermal stratification varied with changes in surface energy fluxes (Fig. S4 and S5). The seasonal thermocline was located between 3 and 4 m. At night, when heat was being lost, the water column was nearly uniformly mixed and horizontal velocities were weak above the seasonal thermocline (Figs. S4 and S6). Vertical velocities indicate the upward and downward movement of convection cells. Largest horizontal flow speeds were found just above the seasonal thermocline. Thermal stratification increased during the day. In consequence, baroclinic flow developed, that is, the direction of horizontal flow varied with depth and accompanying changes in stratification. The increase in near-surface temperature was greater within the plant mat whereas water within the shaded root mat was cooler than that offshore. These different conditions led to different trajectories and in the extent of offshore flow of the plume (Fig. S5). At night, the horizontal spreading of the plume was minimal near the surface. The tracer plume descended below the mat to 3-4 m. However, with minimal horizontal flow, it was retained near-shore. In contrast, during the day, the tracer flowed offshore near the surface as water temperature increased in the mat, and also flowed offshore at 3 m when horizontal velocities increased due to baroclinic flow. The considerable flow of tracer results from an increase in horizontal flow below the mat which would have entrained tracer that had been retained in the root mat. Later in the day, despite continued stratification, highest concentrations of the plume were nearer to shore. The changes between noon and late afternoon resulted from flow reversals. Hence, the effect of baroclinic flow was to cause the plume at 3-4 m to alternately stretch and contract in the cross channel direction. However, with relatively consistent southerly flow in the day, the plume had extended 300 m to the south. At night, as convection again penetrated between 3 and 4 m depth, tracer was mixed in the vertical. While concentrations decreased at 3 m, they increased in the overlying water. AEM3D also simulated tracer penetrating seasonal thermocline at 4 m during both diurnal heating and nocturnal cooling, which was most likely due to the horizontal shear along the seasonal thermocline.

Figure S4. Wind speed and net surface heat flux (a) and snapshots of AEM3D simulated horizontal tracer profile at surface (b1 to b4) and 3.0 m (c1 to c4) at four times identified by the numbered dash-dot lines in panel a. The tracer addition is modeled as increases in CO2 concentrations caused by dispersion of water with an estimated concentration of 235 µM from within the macrophyte mats. The black horizontal line represents the cross-section FB and the gray polygon boundaries the area of macrophyte mat. Arrow and circles in b1 to b4 show the wind direction and speed. A video showing this hydrodynamic simulation can be seen here: <https://youtu.be/la0bX8B3yDc>


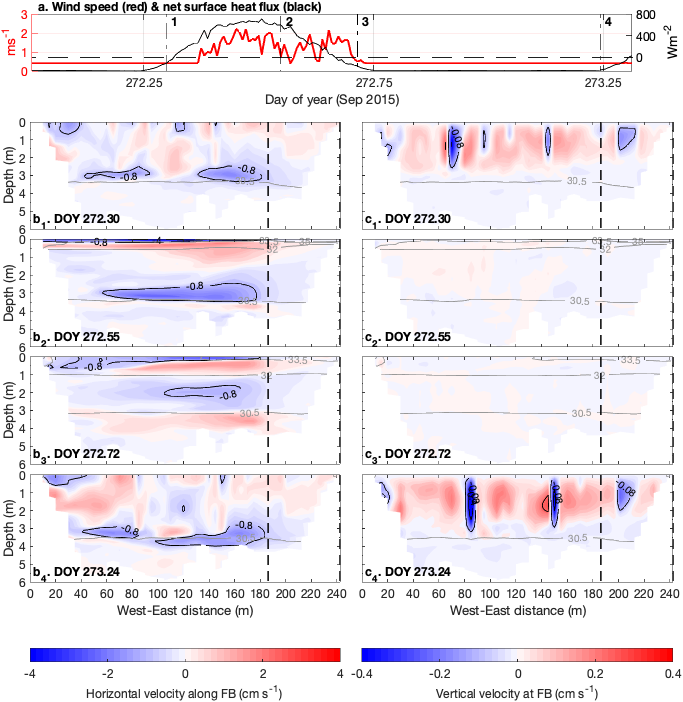


Figure S5. Wind speed along FB and net surface heat flux (a) and snapshots of AEM3D simulated vertical profiles of the easterly positive horizontal velocity along FB (b1 to b4) and the upwardly positive vertical velocity at FB (c1 to c4). Numbered gray lines are isotherms and the black dashed lines mark the extent of the plant mat.

*Tracer release on northern margin of Lake Janauacá*

Carbon dioxide concentration of 250 M was continuously released to the entire water column along northern margin of Lake Janauacá (Fig. S6) from 6 am 22 Aug 2016 to 6 am 27 Aug 2016 (DOY 235.25 to 240.25). The simulation started with horizontally homogenous and vertically varying temperature profile and was forced with local meteorological data (Fig. 7).

Figure S6. Portion of open water in Lake Janauacá: blue dashed line is boundary to another part of lake, red zone indicates where tracer was released. Shading and contours indicate bathymetry with darker shades indicating deeper depths.

**REFERENCES:**

Amaral JHF, Borges AV, Melack JM, Sarmento H, Barbosa PM, Kasper D, de Melo ML, De Fex-Wolf D, da Silva JS, Forsberg BR. 2018. Influence of plankton metabolism and mixing depth on CO2 dynamics in an Amazon floodplain lake. Science of The Total Environment 630:1381–93.

Amaral JHF, Melack JM, Barbosa PM, MacIntyre S, Kasper D, Cortés A, Silva TSF, Nunes de Sousa R, Forsberg BR. 2020. Carbon dioxide fluxes to the atmosphere from waters within flooded forests in the Amazon basin. Journal of Geophysical Research: Biogeosciences 125 e2019JG005293.

Barbosa PM, Farjalla VF, Melack JM, Amaral JHF, da Silva JS, Forsberg BR. 2018. High rates of methane oxidation in an Amazon floodplain lake. Biogeochemistry 137:351–65.

Barbosa PM, Melack JM, Amaral JHF, MacIntyre S, Kasper D, Cortés A, Farjalla VF, Forsberg BR. 2020. Dissolved methane concentrations and fluxes to the atmosphere from a tropical floodplain lake. Biogeochemistry 148:129–51.

Frankignoulle M, Borges A, Biondo R. 2001. A new design of equilibrator to monitor carbon dioxide in highly dynamic and turbid environments. Water Research 35:1344–7.

Helms JR, Stubbins A, Ritchie JD, Minor EC, Kieber DJ, Mopper K. 2008. Absorption spectral slopes and slope ratios as indicators of molecular weight, source, and photobleaching of chromophoric dissolved organic matter. Limnology and Oceanography 53: 955–69.

Kasper D, Amaral JHF, Forsberg BR. 2018. The effect of filter type and porosity on total suspended sediment determinations. Analytical Methods 10:5532– 5539.

Pinel S, Bonnet M-P, Santos Da Silva J, Moreira D, Calmant S, Satgé F, Seyler F. 2015. Correction of interferometric and vegetation biases in the SRTMGL1 spaceborne DEM with hydrological conditioning towards improved hydrodynamics modeling in the Amazon basin. Remote Sensing 7:16108–30.

Strickland JD, Parsons TR. 1972. A practical handbook of seawater analysis. p. 310. Ottawa: Fisheries Research Board of Canada.

Valderrama JC. 1981. The simultaneous analysis of total nitrogen and total phosphorus in natural waters. Marine Chemistry 10:109–22.

Weishaar JL, Aiken GR, Bergamaschi BA, Fram MS, Fujii R, Mopper K. 2003. Evaluation of specific ultraviolet absorbance as an indicator of the chemical composition and reactivity of dissolved organic carbon. Environmental Science & Technology 37: 4702–8.

Weiss RF, Price BA. 1980. Nitrous oxide solubility in water and seawater. Marine Chemistry 8:347–59.

Wiesenburg DA, Guinasso NL. 1979. Equilibrium solubilities of methane, carbon monoxide, and hydrogen in water and sea water. Journal of Chemical & Engineering Data 24:356–60.

1. *Corresponding author; e-mail: jh.amaral@gmail.com Address: 1Earth Research Institute, 6832 Ellison Hall, University of California, Santa Barbara, California, USA 93106-3060 Phone +1(805) 893-4885, Fax: 893-2578 [↑](#footnote-ref-1)
